# Supplementary material for: Exploring FTAs, seafood exports, and SDGs: a gravity model analysis of Pakistan’s seafood trade with China and regional partners
Source: Frontiers journal article supplement (doi:10.3389/fmars.2025.1553780), 2025-04-10
Supplement: Table_1.docx [file Table_1.docx]

Supplementary Material

Appendix 1 Seafood export destinations of Pakistan

| Country | Country |
| --- | --- |
| China | Indonesia |
| UAE | Vietnam |
| Saudi Arabia | Philippines |
| Kuwait | India |
| United States |  |
| Japan |  |
| South Korea |  |
| Thailand |  |
| Malaysia |  |
| Afghanistan |  |
| Iran |  |
| Sri Lanka |  |
| Spain |  |
| France |  |
| Italy |  |

Appendix 2 Details of HS code 03 (Fish and crustaceans, molluscs and other aquatic invertebrates)

| Code | Detail |
| --- | --- |
| 301 | Live fish |
| 302 | Fish, fresh or chilled (excluding fish fillets and other fish meat of heading 0304) |
| 303 | Frozen fish (excluding fish fillets and other fish meat of heading 0304) |
| 304 | Fish fillets and other fish meat, whether or not minced, fresh, chilled or frozen |
| 305 | Fish, fit for human consumption, dried, salted or in brine; smoked fish, fit for human consumption, whether or not cooked before or during the smoking process |
| 306 | Crustaceans, whether in shell or not, live, fresh, chilled, frozen, dried, salted or in brine, even smoked, incl. crustaceans in shell cooked by steaming or by boiling in water |
| 307 | Molluscs, fit for human consumption, even smoked, whether in shell or not, live, fresh, chilled, frozen, dried, salted or in brine |
| 308 | Aquatic invertebrates other than crustaceans and molluscs, live, fresh, chilled, frozen, dried, salted or in brine, even smoked |

Appendix 3a Annual seafood export values from Pakistan to World (in thousand USD)

| Year | HS Code | | | | | | | |
| --- | --- | --- | --- | --- | --- | --- | --- | --- |
| 301 | 302 | 303 | 304 | 305 | 306 | 307 | 308 |
| 2005 | 397 | 19453 | 83536 | 2160 | 6451 | 34351 | 309 | 0 |
| 2006 | 426 | 14251 | 101293 | 7236 | 9971 | 34297 | 239 | 0 |
| 2007 | 359 | 11915 | 84101 | 4242 | 11878 | 46366 | 2194 | 0 |
| 2008 | 265 | 23662 | 119655 | 682 | 13707 | 58499 | 1078 | 0 |
| 2009 | 461 | 3545 | 121926 | 7956 | 12178 | 46843 | 0 | 0 |
| 2010 | 1207 | 5748 | 138814 | 929 | 17857 | 64771 | 1713 | 0 |
| 2011 | 2102 | 9858 | 162729 | 5887 | 10417 | 67738 | 2320 | 0 |
| 2012 | 819 | 10107 | 146028 | 13517 | 10586 | 61900 | 3921 | 344 |
| 2013 | 2204 | 21361 | 179626 | 14418 | 12981 | 101041 | 755 | 743 |
| 2014 | 3886 | 32238 | 191329 | 15069 | 10595 | 97841 | 4632 | 36 |
| 2015 | 3591 | 10749 | 202018 | 13976 | 16337 | 81266 | 771 | 24 |
| 2016 | 2340 | 17670 | 198979 | 13277 | 13465 | 87298 | 3352 | 0 |
| 2017 | 1256 | 4677 | 267830 | 25098 | 22925 | 84706 | 1061 | 0 |
| 2018 | 1224 | 9726 | 287892 | 22005 | 14621 | 90000 | 7045 | 39 |
| 2019 | 529 | 5764 | 335613 | 21267 | 8041 | 99676 | 4287 | 316 |
| 2020 | 405 | 19066 | 171426 | 17898 | 3791 | 100993 | 54955 | 5001 |
| 2021 | 246 | 22354 | 114252 | 28318 | 2904 | 102730 | 122075 | 6509 |
| 2022 | 300 | 23702 | 166163 | 26046 | 1517 | 114347 | 107885 | 2316 |
| 2023 | 992 | 9397 | 193300 | 22723 | 1866 | 112523 | 121082 | 5,27 |

Source: International Trade Centre

Appendix 3b Annual seafood import values of Pakistan from World (in thousand USD)

| Year | HS Code | | | | | | | |
| --- | --- | --- | --- | --- | --- | --- | --- | --- |
| 301 | 302 | 303 | 304 | 305 | 306 | 307 | 308 |
| 2005 | 77 | 32 | 1525 | 19 | 0 | 24 | 0 | 0 |
| 2006 | 48 | 15 | 1564 | 3 | 0 | 1 | 3 | 0 |
| 2007 | 99 | 5 | 1576 | 9 | 0 | 1 | 0 | 0 |
| 2008 | 142 | 93 | 986 | 110 | 3 | 0 | 36 | 0 |
| 2009 | 138 | 95 | 392 | 204 | 4 | 0 | 138 | 0 |
| 2010 | 141 | 44 | 1023 | 957 | 4 | 7 | 358 | 0 |
| 2011 | 150 | 57 | 2427 | 1221 | 7 | 0 | 19 | 0 |
| 2012 | 128 | 45 | 1405 | 2737 | 9 | 22 | 0 | 0 |
| 2013 | 223 | 11 | 5901 | 5373 | 5 | 39 | 2 | 0 |
| 2014 | 263 | 4 | 10720 | 3410 | 9 | 15 | 0 | 0 |
| 2015 | 361 | 32 | 14531 | 1251 | 7 | 245 | 6 | 4 |
| 2016 | 485 | 17 | 6670 | 9834 | 9 | 17 | 21 | 11 |
| 2017 | 523 | 35 | 603 | 21290 | 8 | 42 | 36 | 0 |
| 2018 | 525 | 19 | 339 | 9772 | 2 | 62 | 68 | 0 |
| 2019 | 506 | 415 | 58 | 8626 | 4 | 60 | 365 | 0 |
| 2020 | 183 | 443 | 7 | 6143 | 10 | 1 | 0 | 0 |
| 2021 | 178 | 701 | 0 | 8086 | 31 | 2 | 14 | 0 |
| 2022 | 164 | 554 | 5 | 7140 | 6 | 3 | 0 | 0 |
| 2023 | 60 | 424 | 4 | 4502 | 2 | 6 | 23 | 0 |

Source: International Trade Centre

Appendix 4a Annual seafood export values from Pakistan to China (in thousand USD)

| Year | HS Code | | | | | | | |
| --- | --- | --- | --- | --- | --- | --- | --- | --- |
| 301 | 302 | 303 | 304 | 305 | 306 | 307 | 308 |
| 2005 | 3 | 4014 | 22650 | 208 | 1175 | 13 | 210 | 0 |
| 2006 | 1 | 463 | 18034 | 1634 | 3826 | 644 | 36 | 0 |
| 2007 | 1 | 514 | 18845 | 361 | 5072 | 3804 | 1063 | 0 |
| 2008 | 0 | 3483 | 23946 | 27 | 6510 | 5626 | 688 | 0 |
| 2009 | 0 | 68 | 33748 | 2158 | 5551 | 5489 | 0 | 0 |
| 2010 | 21 | 0 | 40942 | 199 | 13363 | 8224 | 350 | 0 |
| 2011 | 28 | 2411 | 23457 | 1668 | 3402 | 10349 | 7 | 0 |
| 2012 | 319 | 120 | 19192 | 470 | 6484 | 12750 | 87 | 82 |
| 2013 | 257 | 454 | 16601 | 29 | 6619 | 11815 | 4 | 0 |
| 2014 | 1429 | 4436 | 27819 | 185 | 6209 | 12180 | 2952 | 0 |
| 2015 | 1945 | 125 | 21338 | 2444 | 5651 | 14332 | 333 | 0 |
| 2016 | 2060 | 3 | 18315 | 127 | 5673 | 21381 | 436 | 0 |
| 2017 | 815 | 11 | 26760 | 446 | 12234 | 19899 | 25 | 0 |
| 2018 | 713 | 63 | 53951 | 996 | 7816 | 26004 | 2199 | 39 |
| 2019 | 365 | 691 | 94805 | 2272 | 6903 | 29265 | 1190 | 316 |
| 2020 | 0 | 1231 | 73518 | 3588 | 1160 | 28549 | 21006 | 5001 |
| 2021 | 0 | 17 | 54567 | 2057 | 1875 | 42934 | 53289 | 6478 |
| 2022 | 0 | 743 | 81868 | 3709 | 468 | 49179 | 51409 | 1880 |
| 2023 | 0 | 258 | 90678 | 5572 | 620 | 50292 | 68061 | 5227 |

Source: International Trade Centre

Appendix 4b Annual seafood import values of Pakistan from China (in thousand USD)

| Year | HS Code | | | | | | | |
| --- | --- | --- | --- | --- | --- | --- | --- | --- |
| 301 | 302 | 303 | 304 | 305 | 306 | 307 | 308 |
| 2005 | 0 | 0 | 0 | 0 | 0 | 0 | 0 | 0 |
| 2006 | 0 | 0 | 0 | 0 | 0 | 0 | 1 | 0 |
| 2007 | 2 | 1 | 0 | 0 | 0 | 0 | 0 | 0 |
| 2008 | 0 | 1 | 0 | 11 | 0 | 0 | 0 | 0 |
| 2009 | 0 | 1 | 47 | 80 | 0 | 0 | 5 | 0 |
| 2010 | 0 | 2 | 51 | 4 | 0 | 0 | 0 | 0 |
| 2011 | 0 | 0 | 17 | 0 | 0 | 0 | 0 | 0 |
| 2012 | 0 | 0 | 72 | 40 | 0 | 0 | 0 | 0 |
| 2013 | 0 | 0 | 33 | 3 | 0 | 0 | 0 | 0 |
| 2014 | 0 | 0 | 0 | 74 | 0 | 0 | 0 | 0 |
| 2015 | 0 | 0 | 0 | 20 | 0 | 0 | 6 | 0 |
| 2016 | 6 | 0 | 0 | 0 | 0 | 1 | 10 | 0 |
| 2017 | 0 | 0 | 0 | 121 | 0 | 0 | 16 | 0 |
| 2018 | 0 | 0 | 0 | 61 | 0 | 0 | 68 | 0 |
| 2019 | 0 | 0 | 0 | 0 | 0 | 0 | 32 | 0 |
| 2020 | 3 | 0 | 0 | 0 | 0 | 0 | 0 | 0 |
| 2021 | 0 | 0 | 0 | 0 | 0 | 0 | 14 | 0 |
| 2022 | 0 | 0 | 0 | 41 | 0 | 0 | 0 | 0 |
| 2023 | 0 | 0 | 0 | 45 | 0 | 0 | 23 | 0 |

Source: International Trade Centre
